# Supplementary material
Source: publisher figshare collection journal article supplement (https://tandf.figshare.com/articles/dataset/_/5202769)
Supplement: Supplementary file 1 [file 1]

Archive with 7 entries (7 files):
- Appendix A patient questionnaire.pdf
- Appendix B carer questionnaire.pdf
- Appendix C online questionnaire.pdf
- Appendix D Interview topic guide.docx
- Appendix E Characteristics of interview participants.docx
- Appendix F Supporting quotes from interviews and questionnaires.docx
- Appendix G- A full list of digital technologies and adaptive solutions mentioned in the study.pdf
