# Supplementary material
Source: publisher figshare collection journal article supplement (https://tandf.figshare.com/articles/dataset/_/5202769)
Supplement: Supplementary file 1 [file 1 › Appendix B carer questionnaire.pdf]

**Exploring technology use by those living with motor neurone disease.**

# **THIS SURVEY IS FOR FAMILY MEMBERS OR FRIENDS**

- Please complete **all** of this form and then go on to fill in the attached survey.
- If you wish to complete the survey online go to  
**<http://sitran.dept.shef.ac.uk/clinical-studies/telemedicine/survey/>**
- You will also need to fill in all of the first page of this booklet and return it in the freepost envelope.
- Please return the freepost envelope by the **1<sup>st</sup> July 2015**.
- *Thanks for helping us with our research.*

\*\*\*\*\*

## **CONSENT FORM:**

- I confirm that I have read and understood the “Patient and family member information leaflet” version 1 and have had enough time and opportunity to discuss the study and ask any questions in order to come to my decision.
- I understand that my participation is voluntary, but after I return the completed survey the, information I give would be retained for analysis.
- I confirm I am 18 years old or over and am a friend or family member of someone with MND.
- **I agree to take part in this study**

Signature: .....

Print Name: ..... Date:.....

Address: .....



*Please try and answer all the questions although you are welcome to skip a question if you don't wish to answer it. There is a space in the last sheet to write comments.*

*We expect this to take about 10-15 minutes but please take as long as you wish.*

**1. How old are you?**   years

**2. Are you...** Male ☐ Female ☐

**3. What is your postcode?**

*(just give us the first 3 or 4 letters or numbers e.g. S6 or NG14..)*

**4. Are you.?**

A partner of someone with MND ☐

A family member of someone with MND ☐

A friend of someone with MND ☐

**5. Which of these do you use?**

|                                     | Daily                    | Several times a week     | Once a week or less      | Once a month or less     | Available in the house but I don't use them | Not available in my house |
|-------------------------------------|--------------------------|--------------------------|--------------------------|--------------------------|---------------------------------------------|---------------------------|
| a. Desktop computer                 | <input type="checkbox"/>                    | <input type="checkbox"/>  |
| b. Laptop                           | <input type="checkbox"/>                    | <input type="checkbox"/>  |
| c. iPad                             | <input type="checkbox"/>                    | <input type="checkbox"/>  |
| d. Kindle                           | <input type="checkbox"/>                    | <input type="checkbox"/>  |
| e. Other tablet computer            | <input type="checkbox"/>                    | <input type="checkbox"/>  |
| f. iPhone                           | <input type="checkbox"/>                    | <input type="checkbox"/>  |
| g. Other smart phone                | <input type="checkbox"/>                    | <input type="checkbox"/>  |
| h. Other (please describe)<br>_____ | <input type="checkbox"/>                    | <input type="checkbox"/>  |

\*\*\*\*\*

***This page is for people who use technology LESS THAN once a month. If you use technology more than once a month you can skip to the next page.***

\*\*\*\*\*

**6. Could you tell us why you use technology less than once a month? (you can tick as many as you like)**

- |                                     |                          |
|-------------------------------------|--------------------------|
| I don't need it                     | <input type="checkbox"/> |
| I don't know how to use them        | <input type="checkbox"/> |
| I'm worried I might break something | <input type="checkbox"/> |
| I can't afford to buy a computer    | <input type="checkbox"/> |
| I'm too ill                         | <input type="checkbox"/> |
| My hand function isn't good enough  | <input type="checkbox"/> |
| My reading isn't good enough        | <input type="checkbox"/> |
| My vision isn't good enough         | <input type="checkbox"/> |
| Other _____                         | <input type="checkbox"/> |

**7. If you had the correct equipment, how confident are you using a basic computer?**

- |                                                    |                          |
|----------------------------------------------------|--------------------------|
| I know how to use one with no/little help          | <input type="checkbox"/> |
| I'd need a some training but could probably manage | <input type="checkbox"/> |
| I don't think I could use one without help         | <input type="checkbox"/> |
| Other (please describe) _____                      | <input type="checkbox"/> |

**8. Is there someone else living with you who does use a computer, tablet or smart phone?**

- |     |                          |
|-----|--------------------------|
| Yes | <input type="checkbox"/> |
| No  | <input type="checkbox"/> |

\*\*\*\*\*

**9. If you use the internet, which of these do you use? (you can tick as many as you like)**

- |                                                 |                          |
|-------------------------------------------------|--------------------------|
| Email                                           | <input type="checkbox"/> |
| Skype/making calls                              | <input type="checkbox"/> |
| Facebook/twitter                                | <input type="checkbox"/> |
| Reading newspapers or other websites            | <input type="checkbox"/> |
| Online shopping or banking                      | <input type="checkbox"/> |
| Playing games                                   | <input type="checkbox"/> |
| Watching TV                                     | <input type="checkbox"/> |
| Listening to music or the radio                 | <input type="checkbox"/> |
| Work                                            | <input type="checkbox"/> |
| Getting information about MND                   | <input type="checkbox"/> |
| Talking to other people with MND e.g. on forums | <input type="checkbox"/> |
| Other _____                                     | <input type="checkbox"/> |
| I don't use the internet                        | <input type="checkbox"/> |

**10. Have you ever used any of these websites to find out about MND?**

|                                         | Never                    | Once                     | Two to five times        | More than five times     |
|-----------------------------------------|--------------------------|--------------------------|--------------------------|--------------------------|
| a. MND Association                      | <input type="checkbox"/> | <input type="checkbox"/> | <input type="checkbox"/> | <input type="checkbox"/> |
| b. MND Association information leaflets | <input type="checkbox"/> | <input type="checkbox"/> | <input type="checkbox"/> | <input type="checkbox"/> |
| c. MND Association forum                | <input type="checkbox"/> | <input type="checkbox"/> | <input type="checkbox"/> | <input type="checkbox"/> |
| d. MND Scotland                         | <input type="checkbox"/> | <input type="checkbox"/> | <input type="checkbox"/> | <input type="checkbox"/> |
| e. ALS Association                      | <input type="checkbox"/> | <input type="checkbox"/> | <input type="checkbox"/> | <input type="checkbox"/> |
| f. Patientslikeme                       | <input type="checkbox"/> | <input type="checkbox"/> | <input type="checkbox"/> | <input type="checkbox"/> |
| g. MyMND or MyNIV                       | <input type="checkbox"/> | <input type="checkbox"/> | <input type="checkbox"/> | <input type="checkbox"/> |
| h. Patient.co.uk                        | <input type="checkbox"/> | <input type="checkbox"/> | <input type="checkbox"/> | <input type="checkbox"/> |
| i. Healthtalkonline.org                 | <input type="checkbox"/> | <input type="checkbox"/> | <input type="checkbox"/> | <input type="checkbox"/> |
| j. Facebook sites                       | <input type="checkbox"/> | <input type="checkbox"/> | <input type="checkbox"/> | <input type="checkbox"/> |
| k. Twitter                              | <input type="checkbox"/> | <input type="checkbox"/> | <input type="checkbox"/> | <input type="checkbox"/> |
| l. Other (please describe)<br>_____     | <input type="checkbox"/> | <input type="checkbox"/> | <input type="checkbox"/> | <input type="checkbox"/> |

## 11. What information would you like to know more about?

|                                                     |                          |
|-----------------------------------------------------|--------------------------|
| a. The causes of MND                                | <input type="checkbox"/> |
| b. The physical effects of MND                      | <input type="checkbox"/> |
| c. The psychological effects of MND                 | <input type="checkbox"/> |
| d. Treatments                                       | <input type="checkbox"/> |
| e. Research in which I can take part                | <input type="checkbox"/> |
| f. Equipment to help with daily life                | <input type="checkbox"/> |
| g. Medical treatments such as breathing machines    | <input type="checkbox"/> |
| h. Palliative care and end of life choices          | <input type="checkbox"/> |
| i. Other peoples' experience of MND                 | <input type="checkbox"/> |
| j. Financial support                                | <input type="checkbox"/> |
| k. Family and carer support                         | <input type="checkbox"/> |
| l. Local groups or talking to other people with MND | <input type="checkbox"/> |
| m. Charities and fundraising                        | <input type="checkbox"/> |
| n. Other ( <i>please describe</i> ) _____           | <input type="checkbox"/> |

## 12. How would you prefer to receive information about MND?

|                                                   |                          |                                    |
|---------------------------------------------------|--------------------------|------------------------------------|
| Internet websites with written information        | <input type="checkbox"/> | Please<br>choose your<br>top three |
| Internet websites with videos                     | <input type="checkbox"/> |                                    |
| Twitter                                           | <input type="checkbox"/> |                                    |
| eBooks I can download e.g. for a Kindle or tablet | <input type="checkbox"/> |                                    |
| Email                                             | <input type="checkbox"/> |                                    |
| Written information e.g. leaflets                 | <input type="checkbox"/> |                                    |
| Books                                             | <input type="checkbox"/> |                                    |
| I don't want any more information                 | <input type="checkbox"/> |                                    |

## 22. Did your MND care team tell you about information on the internet?

|                                              |                          |
|----------------------------------------------|--------------------------|
| They recommended looking on the internet     | <input type="checkbox"/> |
| They recommended not looking on the internet | <input type="checkbox"/> |
| They recommended a specific site             | <input type="checkbox"/> |

Which site(s) did they recommend? \_\_\_\_\_

**13. Has the MND doctor caring for your friend/relative ever used any of these methods to talk to either of you at home?**

|                        |                          |
|------------------------|--------------------------|
| Telephone calls        | <input type="checkbox"/> |
| Email/computer         | <input type="checkbox"/> |
| Text                   | <input type="checkbox"/> |
| Video calls e.g. Skype | <input type="checkbox"/> |
| None of these          | <input type="checkbox"/> |

**14. If you had the correct equipment and training do you think any of these would be acceptable ways to talk to your MND care team?**

|                                       | Yes                      | Maybe                    | No                       |
|---------------------------------------|--------------------------|--------------------------|--------------------------|
| Telephone calls                       | <input type="checkbox"/> | <input type="checkbox"/> | <input type="checkbox"/> |
| Email/computer                        | <input type="checkbox"/> | <input type="checkbox"/> | <input type="checkbox"/> |
| Text                                  | <input type="checkbox"/> | <input type="checkbox"/> | <input type="checkbox"/> |
| Video calls e.g. Skype or via your TV | <input type="checkbox"/> | <input type="checkbox"/> | <input type="checkbox"/> |

**15. If you had the correct equipment and training do you think any of these would be acceptable to you to use INSTEAD OF a hospital appointment?**

|                                       | Yes                      | Maybe                    | No                       |
|---------------------------------------|--------------------------|--------------------------|--------------------------|
| Telephone calls                       | <input type="checkbox"/> | <input type="checkbox"/> | <input type="checkbox"/> |
| Email/computer                        | <input type="checkbox"/> | <input type="checkbox"/> | <input type="checkbox"/> |
| Text                                  | <input type="checkbox"/> | <input type="checkbox"/> | <input type="checkbox"/> |
| Video calls e.g. Skype or via your TV | <input type="checkbox"/> | <input type="checkbox"/> | <input type="checkbox"/> |

**16. If you answered maybe or definitely no, what might concern you about these options?**  
 You can carry on on the next page.

\*\*\*\*\*

***You're finished.*** Thank you! Your involvement in research is important to improve the lives of people living with MND. Please check to make sure you have answered every page and return the survey in the freepost envelope as soon as possible and before the **1st of July**.

You can read the results of this research on the Sheffield Institute for Translational Neurosciences website later in the year, or get more information by calling 0114 22 22260 or email [e.hobson@sheffield.ac.uk](mailto:e.hobson@sheffield.ac.uk)

**If you wish to make any more comments, please do so here.**
