# Supplementary material
Source: publisher figshare collection journal article supplement (https://tandf.figshare.com/articles/dataset/_/5202769)
Supplement: Supplementary file 1 [file 1 › Appendix D Interview topic guide.docx]

**Appendix D: Interview topic guide**

The topic guide was developed by EH and SF. The topic guide was shaped by a literature review, consultation with the Sheffield MND Research Advisory Group which includes patients, carers and volunteers and consultation with MND clinicians. Early interviews influenced the development of the topic guide.

***

Introductions, aims of the interview, ground rules established and consent reconfirmed.

Information seeking and needs at diagnosis

1. So if we go back to the start, can you tell me about the day you were diagnosed with MND?
2. When you were first diagnosed with MND, how did you receive information about MND?
3. Were you happy with the amount of information that you received on that day?
4. Could there have been more or little information discussed on that particular day?
5. MND Association?
6. How did that make you feel?
7. Were you told how to access information about MND from the MND Care Team?
8. What are your views on that?
9. Do you think you need different information now you have lived with MND for some time?
10. Can you think of a time when you needed to know the answer to a question? What happened?
11. What information would you tell someone who has just been diagnosed with MND? What about their family or those who care for them?

Attitudes towards the internet and other devices

1. Do you have access to the Internet at home? If yes- Do you use the internet?
2. How do you use the Internet?
3. Are there any certain devices/technologies that help you use the Internet easier?
4. Do you find any difficulties in using technology? If yes- what are the difficulties (expand?) Can you explain a little further please?
5. What technology did you have before your diagnosis of MND?
6. Have you bought any technology since the diagnosis? If yes, what?
7. Have you ever used email or telephone to speak to your doctor or your MND care team?
8. Do you think that is something you might want to consider in the near future?
9. Can you tell me about your experience (good/bad) when you have used email/telephone to contact the doctor/MND care team?
10. Are there any devices/technologies that you don’t have (or not have access to) that you think would help your day-to-day living with MND?
11. How would these technologies improve living with MND?
12. Are there any barriers for which you are not able to have these devices/technologies (e.g. money)?

Conclusion, reconfirm consent.
