# Supplementary material
Source: publisher figshare collection journal article supplement (https://tandf.figshare.com/articles/dataset/_/5202769)
Supplement: Supplementary file 1 [file 1 › Appendix E Characteristics of interview participants.docx]

Appendix E: Descriptions of the participants in the qualitative interviews

| Interview | Patient | Gender Age | Disease duration | Disability  severity | | ALS FRS-R | Technology use | Family  member | Age | Technology use |
| --- | --- | --- | --- | --- | --- | --- | --- | --- | --- | --- |
| 1 | Patient 1 | F  40s | ALS 13 years | Bulbar: mild  UL: moderate  LL: mild | 38 | | Daily | No carer present | - | - |
| 2 | Patient 2 | F  40s | ALS 4 years | Bulbar: mild  UL: severe  LL: moderate | 28 | | Daily | Husband 2 | 40s | Daily |
| 3 | Patient 3 | F  70s | ALS 11 years | Bulbar: mild  UL: severe  LL: severe | 33 | | Daily | Son 3 | 50s | Daily |
| 4 | Patient 4 | F  50s | ALS 10 months | Bulbar: mild  UL: mild  LL: mild | 40 | | Daily | Husband 4 | 50s | Daily |
| 5 |  | - | - | - | - | | - | Son 5 | 30s | Daily |
| 6 | Patient 6 | F  70s | ALS 4 months | Bulbar: mild  UL: mild  LL: mild  Other impairments: cognition, language | 40 | | Less than once a week | Husband 6 | 70s | Daily |

M: male, F: female, UL: upper limb, LL: lower limb
