# Supplementary material
Source: publisher figshare collection journal article supplement (https://tandf.figshare.com/articles/dataset/_/5202769)
Supplement: Supplementary file 1 [file 1 › Appendix F Supporting quotes from interviews and questionnaires.docx]

**Appendix F: Supporting quotes from interviews and questionnaires**

**Technology enabling a normal life**

*“It’s going to a stage where he’s going worse now but at the moment we can still manage.” Son 5*

*“I’m amazed at the technology that there is out there. Have we mastered it all ourselves at this moment in time?-No. Are we going looking for it at this moment in time?-No. Will we go look for it in the future?-Maybe” Husband 6*

*“iPad mini: using it for documents instead of paper or needing heavier laptop
taking notes as can't use pens etc” Patient online questionnaire*

*“Dragon software; I use for emails, surveys and on occasion when my hands are tired I use the commands to move the mouse cursor around the screen on my PC.” Patient online questionnaire*

*“I purchased an iPad primarily to read books but also I understand other software can be used on this to assist with communications at a later date. I had hoped that the included voice activated software would have been better as I would like software that could actually open the book I'm reading and actually turn the pages for me.” Patient online questionnaire*

***Using the internet to access information and support***

*“We knew nothing of the condition, and obviously we wanted to research it.” Patient 2*

*“I think from the doctor’s point of view we weren’t really given that much information at all. It was likelihood is two to three years and that’s about it. We did have some questions about whether it’d be a steady progression or this kind of stuff. I remember there were no pamphlets to take home or anything but you know ‘you got MND what are you going to do next?’ or anything like that. Most of the stuff we found out I suppose we found out either on the internet or [an MND specialist]” Son 3*

*“I don’t know anyone who’s got it. I’m always on the internet: I like doing a lot of research and stuff but it’s something that’s never crossed my mind. We wasn’t given any direct information from the doctor who gave us the results. … I just went on the internet, typed it in all the forum that came up, from there it started, figuring out what people suffer. Husband 6*

*“On the day I was diagnosed, I just had a piece of paper like a 24 hour helpline and something from the hospital and then [MND specialist nurse’s] number to call and [consultant’s] name and number for her secretary.” Patient 4*

*“We kind had a good look at the herbal side of things, you do take some between 10 and 15 herbal pills a day. Whether they’re working or whether she’s just stubborn, we’re not quite sure.” Son 3*

*“ Every now and again there’s a question what somebody puts up. You don’t know the answer but all of a sudden there’s somebody else knows the answer and “Oh, that’s an idea”, and obviously that information is shared between the people going through it.” Husband 2*

*“I do always have to have an arm rest. I had to buy and have fitted an arm rest in my car umm to rest my arms because they do get tired.” Patient 1*

*“I went for a laptop as well because it’s larger. I find the smaller devices, I find that they’re too close, I tend to press something I don’t want to press and so a laptop and the largest I can get. Umm, I find it easier to use.” Patient 1*

*“I generally use my iPad and bought the laptop to enable me to use a head mouse, it was bought on the recommendation of Assistive Technology department as it has more uses than an iPad” Patient online questionnaire*

*“A: But we only found this out because we’re, we’re friends with another couple that has this,….*

*H: Who’s doing it…*

*A: the husband has it and he’s doing it and everything that we’ve sorted out recently is because they’ve gone: ‘Haven’t you got this?’ ‘Haven’t you got that?’ ‘Why aren’t you doing this?’ [referring to voice banking]” Husband 2*

*“I won’t…there’s lots of things written on the net. I’m not a doctor: my interpretation can be way off beam. Leave it to the professionals. … I don’t want to be looking up MND… A [doctor] has said to us: “No two patients with MND are the same”.” Husband 6*

*“It’s almost like the MND Association are telling the worst because it’s stories that gets some money in for the Association, which is good in one way but actually it’s not helped my brother or my mum.” Patient 4*

*“[The information] was either very technical or not enough information… a lot of it was contradictory” Son 3*

“*If I read something, it will worry me and it will go round in my head, it’ll keep me awake. I don’t need to, if it isn’t going to do anything beneficial, I don’t need to read about it and worry myself. I would rather just deal with the disease as it goes along and keep positive attitude.” Patient 2*

*“I don’t want to be delving into technology on Google, I’ll listen to the technology that we’re getting from the MND Association and I’ll listen to the technology that we’re getting from the professionals but not ‘tell me about MND’ on Google.” Husband 6*

*“I would only recommend certain sites, like MNDA…they will tell you the facts. Just make sure if you go to the correct place.” Patient 1*

*“I wouldn’t advise anyone to go online… not initially… Not until they have actually spoke to [an MND specialist], to try and understand the condition a little more because … the guidelines are that you will die within 2 years or what of the diagnosis. And that’s not necessarily the case. Online has its place but it all needs to be talked [about], [you] still need to meet people like the doctors, the nurses here who deal with it day to day and not just what somebody’s just ‘writ’ once.” Husband 2*

*“I would ring [MND nurse] and she would answer any questions. So I didn’t really feel I needed the internet.” Patient 1*

“*We came away really positively and everybody else was saying “oooh you’ve got that” but I said but there’s hope”* Patient 4

*“If [the doctor] had given us too much, I think that it would have frightened … I couldn’t have coped with it.” Husband 4*

*“Instantly, somebody who’s diagnosed with motor neurone would have a one point of contact, who’d know where to find the information, might not know it but would find the information out so they could help.” Husband 2*

*“I had never heard of MND before but sadly my mum had heard of it. So it hit her before it hit me.” Patient 1*

*“If we’d be able to control what they got to hear from us, rather than going on the internet and frightening themselves… it was quite difficult really… they had probably too much information rather than not enough...”*

*“That’s what’s difficult you know, it’s everybody else.” Patient and Husband 4*

**Using technology to access MND care**

*“There’s a good triangulation and the best of it is that they do communicate with each other so whatever [MND doctor] writes up today, [hospice] will get a copy and also our doctor gets a copy so if you like, the triangle and the loop is constantly being topped up. Technology plays its wonderful part in that because it isn’t the snail mail anymore you know, its email, its all sorts of different things so they are talking to each other.” Husband 6*

*“It would make better use of resources and it saves those suffers from having to travel when it is virtually impossible to leave there home” Patient online*

*“Being in the late stages of Mnd it would be an advantage to use computers Internet FaceTime etc rather than being dragged to a busy hospital for an appointment.” Patient online questionnaire*

*“I’m looked after in Sheffield. I like to go over to see them. I much prefer a face to face session with them.” Patient postal questionnaire*

*“I feel that more can be gained from a face-to-face meeting as communication is more than just using a voice.” Patient online questionnaire*

*“Given that the vast majority of people with MND loose their ability to speak, having an effective spontaneous conversation using a communication device whilst under time pressure e.g. on a video call, is not really possible.” Patient postal survey*

**Barriers to technology use**

*“She’s not a major gizmo technology person” Husband 6*

*“He’s never really been interested. He’s worked all his life and he’s been work, home, work, home, rest, go back to work … it’s never really bothered him really” Son 5*

*“[My wife] can’t read for any length of time because of concentration. I ended up reading a lot of the stuff to her… Because you’ve slowed down you feel you’re too slow when you’re using it. It’s one of the problems … your coordination [and] you slow down.”* Husband 6

*“It would be nice to somebody could show you or tell you without having the obligation to sell it to you. They’ll tell you what you want to hear to buy it not necessarily whether if it’s any good for you” Husband 4*

*“We should have known six months ago” Husband 2*

*“…when I could still talk properly” Patient 2 [referring to voice banking]*

*“Getting used to using technology as never used a computer before. I am going to need technology based help as my speech is getting worse, using a tablet is helping me lose my fear of not being able to use computerised aids.” Patient online questionnaire*

*“I used Dragon voice activated software, I'm actually using it to complete this survey except for mouse clicks as I can still left click a mouse with my right hand and the software to use the mouse is very slow.” Patient online questionnaire*
