# Supplementary material
Source: publisher figshare collection journal article supplement (https://tandf.figshare.com/articles/dataset/_/5202769)

## Appendix G: A full list of digital technologies and adaptive solutions mentioned in the study

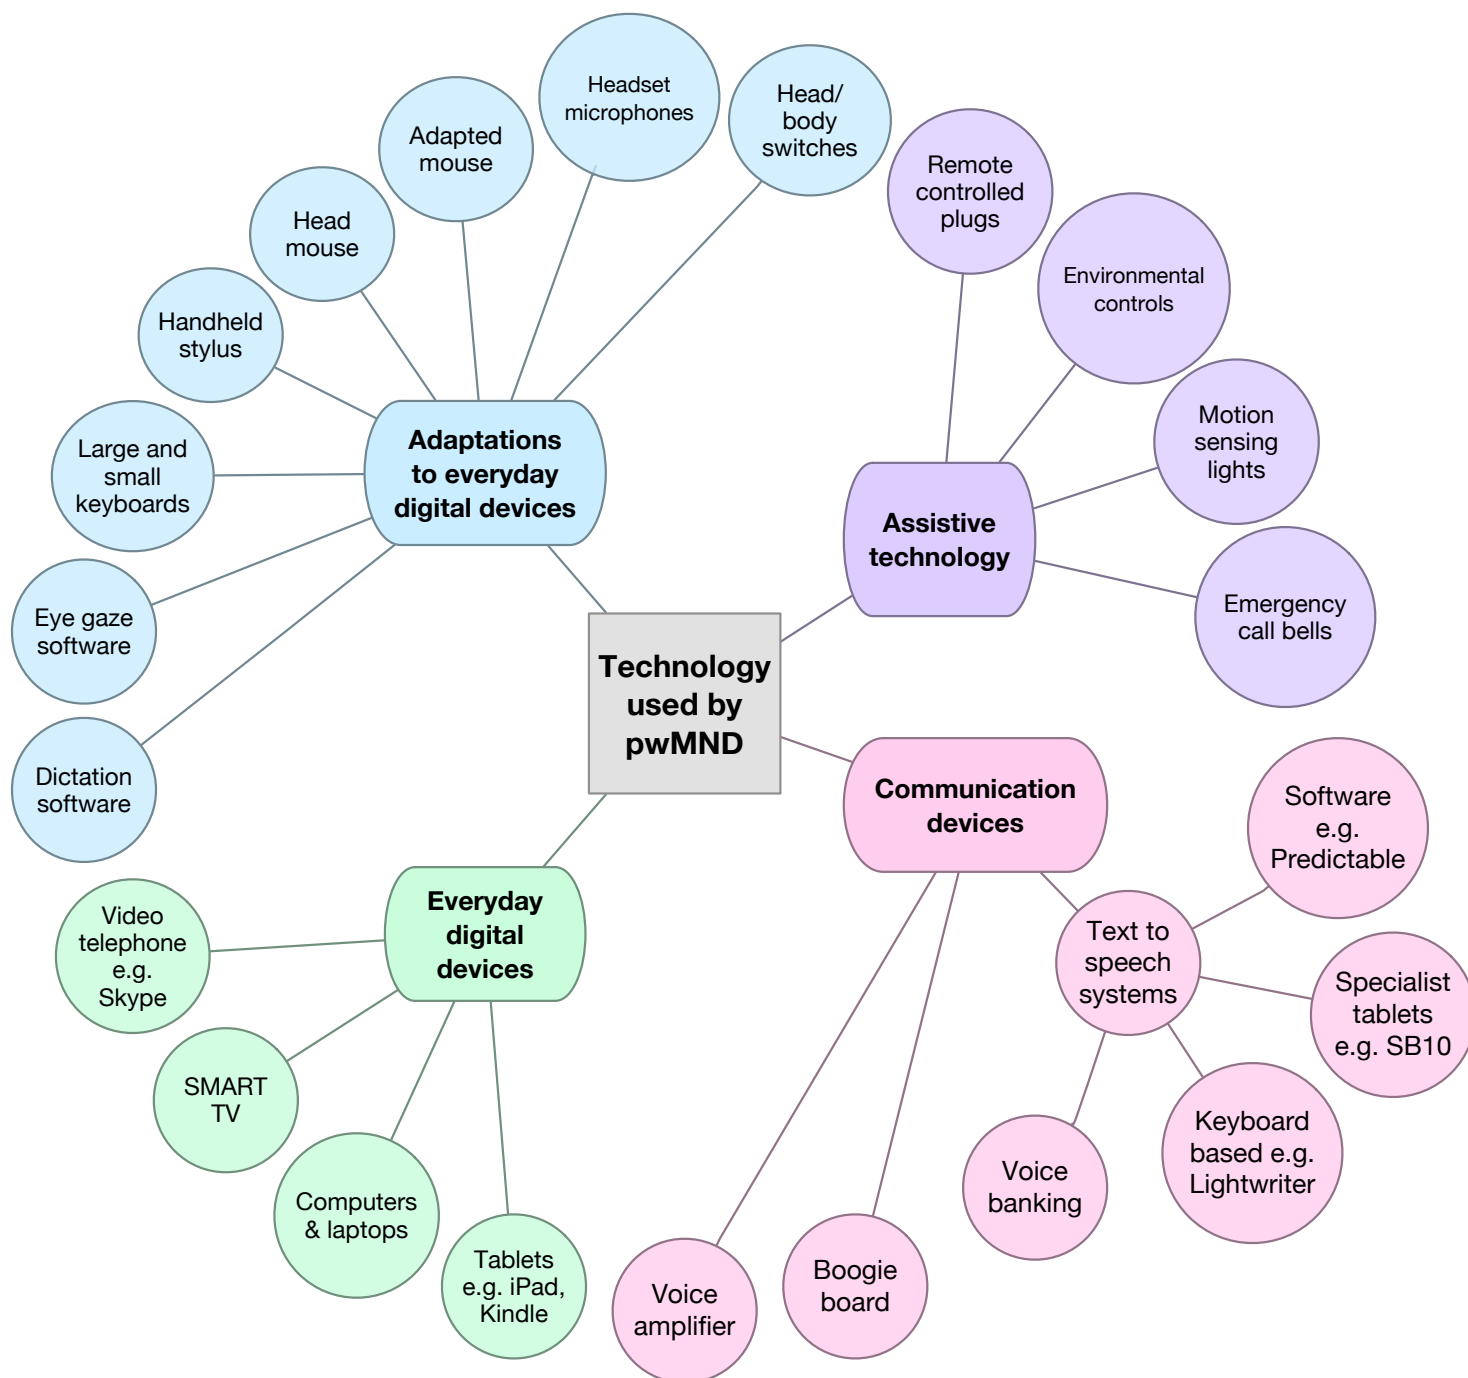

Supplement: Supplementary file 1 [file 1 › Appendix G- A full list of digital technologies and adaptive solutions mentioned in the study.pdf]
